# Supplementary material
Source: publisher site journal article supplement (https://www.dovepress.com/article/347811)
Supplement: Supplementary file 1 [file get_supplementary_file.php]

**Appendix A. Terms used in the international literature** **to describe prehospital healthcare**

Adapted from Burgess et al, 2010; National EMS Advisory Council, 2017 6,9

| **Terms utilised to identify prehospital healthcare** |
| --- |
| Advanced life support services |
| Aeromedical retrieval |
| Air ambulance services |
| Ambulance services |
| Basic life support services |
| Community paramedicine service |
| Critical care transportation services |
| Emergency ambulance services |
| Emergency medical services (EMS) |
| Emergency rescue |
| Emergency services |
| Helicopter Emergency Medical Service (HEMS) |
| Medical rescue services |
| Medical transportation services |
| Military medicine |
| Mobile health care services |
| Mobile integrated health care services |
| Mobile intensive care services |
| Out of hospital emergency services |
| Prehospital emergency medicine |
| Prehospital emergency services |
| Prehospital retrieval medicine |
| Specialty care transportation services |
| 9--‐1--‐1 ambulance services |
| **Terms utilised to identify prehospital healthcare providers** |
| Advanced care technician |
| Advanced EMT |
| Ambulance driver |
| Ambulance attendant |
| Ambulance care technician |
| Ambulance care assistant |
| Ambulance worker |
| Cardiac rescue technician |
| Community paramedic |
| Critical care transport paramedic |
| Emergency care practitioner |
| Emergency medical responder |
| Emergency nurse |
| Emergency practitioner |
| Emergency technician |
| EMSer |
| EMS worker |
| EMT (emergency medical technician) |
| EMT- Intermediate |
| EMT- Paramedic |
| Extended care paramedic |
| Extended care practitioner |
| First responder |
| Flight nurse |
| Flight paramedic |
| Intensive care paramedic |
| Mobile intensive care nurse |
| Mobile intensive care paramedic |
| Out of hospital emergency clinician |
| Paramedic |
| Paramedic assistant |
| Paramedic clinician |
| Paramedic practitioner |
| Physician assistant |
| Prehospital emergency clinician |
| Rescue worker |

**Appendix B. Literature search terms and definitions identified**

**Search terms used:** ambulance, paramedic, paramedicine, military, first aid, emergency medical service, EMS, emergency medical technician, EMT, association, college, healthcare body, organisation

**Definitions of paramedicine/EMS/ambulance services:**

| **Definition** | **Reference** |
| --- | --- |
| Paramedicine is a specialized profession and an essential component of a healthcare system. The paramedic is a professional whose primary focus is to provide immediate, episodic, and unscheduled health care to individuals, families, and communities. Their care is patient-centered and focused on attaining and maintaining optimal health and quality of life.  Paramedic’s practice is specialized in, but not limited to, emergency care and transportation. The paramedic works in a variety of environments, under high-risk conditions, and special events such as disasters and mass casualty incidents. Their care is delivered predominately outside hospitals, but may also include clinic and in-hospital settings. | <http://www.iprcert.net/> |
| Emergency Medical Services, more commonly known as EMS, is a system that provides emergency medical care. Once it is activated by an incident that causes serious illness or injury, the focus of EMS is emergency medical care of the patient(s).  EMS is most easily recognized when emergency vehicles or helicopters are seen responding to emergency incidents. But EMS is much more than a ride to the hospital. It is a system of coordinated response and emergency medical care, involving multiple people and agencies. A comprehensive EMS system is ready every day for every kind of emergency.  EMS is an intricate system, and each component of this system has an essential role to perform as part of a coordinated and seamless system of emergency medical care. An EMS system comprises all of the following components:   - Agencies and organizations (both private and public) - Communications and transportation networks - Trauma systems, hospitals, trauma centers, and specialty care centers - Rehabilitation facilities - Highly trained professionals   -Volunteer and career prehospital personnel  -Physicians, nurses, and therapists  -Administrators and government officials   - An informed public that knows what to do in a medical emergency | <https://www.ems.gov/whatisems.html> |
| Emergency medical services or “EMS” means an integrated medical care delivery system to provide emergency and nonemergency medical care at the scene or during out-of-hospital patient transportation in an ambulance. | <https://www.lawinsider.com/dictionary/emergency-medical-services> |
| Emergency medical services (EMS) to treat these conditions include rapid assessment, timely provision of appropriate interventions, and prompt transportation to the nearest appropriate health facility by the best possible means to enhance survival, control morbidity, and prevent disability | <https://dcp-3.org/sites/default/files/dcp2/DCP68.pdf> |
| Emergency medical services (EMS) is defined as the system that organizes all aspects of care provided to patients in the pre-hospital or out-of-hospital environment. Hence, EMS is a critical component of the health systems and is necessary to improve outcomes of injuries and other time-sensitive illnesses. | <https://intjem.biomedcentral.com/articles/10.1186/s12245-018-0207-6> |
| Ambulance services involve two separate, but related components. They are: a) the provision of pre-hospital emergency care and; b) the transport of the sick or injured. | <https://ajp.paramedics.org/index.php/ajp/article/view/85/83> |
| Paramedics are generally associated with the provision of emergency or  unscheduled care to acutely ill or injured persons, predominantly in an out of hospital or primary care environment. This may involve autonomous practice, complex patient assessments and delivery of treatment which may include the administration of scheduled medicines | <https://www.paramedicineboard.gov.au/search.aspx?q=fact%20sheet%20what%20is%20a%20registered%20paramedic> |
| The Paramedic is an allied health professional whose primary focus is to provide advanced emergency medical care for critical and emergent patients who access the emergency medical system. This individual possesses the complex knowledge and skills necessary to provide patient care and transportation. Paramedics function as part of a comprehensive EMS response, under medical oversight. Paramedics perform interventions with the basic and advanced equipment typically found on an ambulance. The Paramedic is a link from the scene into the health care system. | <https://www.nremt.org/paramedic/certification> |
| A paramedic works autonomously as a generalist clinician across a range of healthcare settings, usually in emergency, primary or urgent care. They may also specialise in clinical practice, education, leadership or research. | <https://www.collegeofparamedics.co.uk/COP/Become_a_Paramedic/COP/BecomeAParamedic/Become_a_Paramedic.aspx?hkey=f10838de-b67f-44a0-83b7-8140d8cdba83> |
| The branch of medicine dealing with emergency medical care given to people who are injured or ill, typically in a setting outside a hospital. | Google Search “definition of paramedicine” (Oxford Languages) |
